# Supplementary material for: Castration influences intestinal microflora and induces abdominal obesity in high-fat diet-fed mice
Source: PubMed Central journal article supplement (PMC4785334; doi:10.1038/srep23001), 2016-03-10
Supplement: srep23001-s1.pdf [file srep23001-s1.pdf]

**Castration influences intestinal microflora and induces abdominal obesity in high-fat diet-fed mice**

Naoki Harada, Ryo Hanaoka, Hiroko Horiuchi, Tomoya Kitakaze, Takakazu Mitani,  
Hiroshi Inui, and Ryoichi Yamaji.

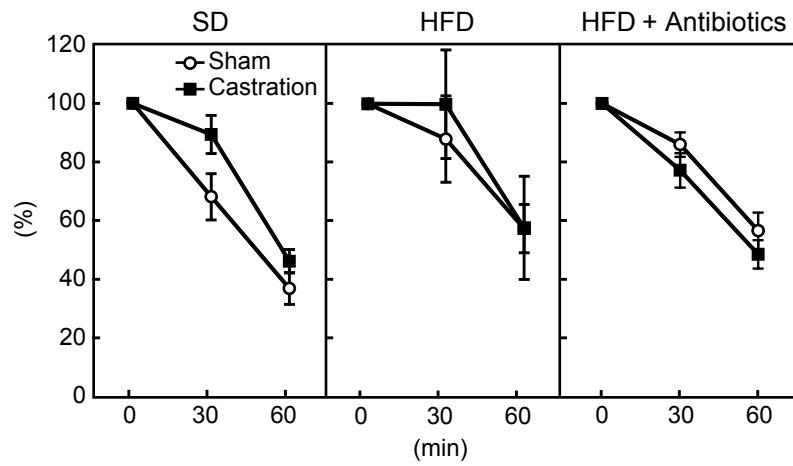

**Supplemental Figure S1. Insulin tolerance test (experiments 1–3).**

Mice at 22-weeks old were fasted for 6 h and human insulin (1 U/kg) were intraperitoneally injected. Blood glucose levels were measured and expressed as percentage change from baseline (0 min). (n=6, SD sham or castration; n=7, HFD without antibiotics sham or castration; n=9, HFD with antibiotics sham; n=6, HFD with antibiotics castration)

**Supplementary Table S1. Relative weight of organs (% of body weight) of 13-week old mice (experiment 4)**

|                           | HFD                    |                        | HFD+Antibiotics        |                        |
|---------------------------|------------------------|------------------------|------------------------|------------------------|
|                           | Sham                   | Castration             | Sham                   | Castration             |
| Visceral WAT              |                        |                        |                        |                        |
| Mesenteric                | 0.65±0.11 <sup>b</sup> | 1.14±0.11 <sup>a</sup> | 0.57±0.07 <sup>b</sup> | 0.55±0.10 <sup>b</sup> |
| Perirenal/retroperitoneal | 0.54±0.11 <sup>b</sup> | 1.07±0.11 <sup>a</sup> | 0.51±0.07 <sup>b</sup> | 0.45±0.11 <sup>b</sup> |
| Epididymal                | 1.49±0.21 <sup>a</sup> | 1.56±0.16 <sup>a</sup> | 1.18±0.17 <sup>a</sup> | 1.09±0.13 <sup>a</sup> |
| Subcutaneous WAT          |                        |                        |                        |                        |
| Inguinal                  | 1.33±0.12 <sup>b</sup> | 2.23±0.16 <sup>a</sup> | 1.23±0.12 <sup>b</sup> | 1.26±0.22 <sup>b</sup> |
| Skeletal muscle           |                        |                        |                        |                        |
| Quadriceps                | 1.43±0.05 <sup>a</sup> | 1.22±0.06 <sup>a</sup> | 1.35±0.08 <sup>a</sup> | 1.37±0.04 <sup>a</sup> |
| Hamstrings                | 3.03±0.18 <sup>a</sup> | 2.86±0.05 <sup>a</sup> | 3.00±0.08 <sup>a</sup> | 2.78±0.12 <sup>a</sup> |

Data are expressed as means ± SEM. Data were analysed by one-way ANOVA followed by Tukey-Kramer's post-hoc test. Different letters mean statistical differences ( $p < 0.05$ ).

**Supplementary Table S2. Composition of the diets (experiments 1–4)**

|                                 | SD     | HFD     |
|---------------------------------|--------|---------|
| Ingredients (g/kg)              |        |         |
| Casein                          | 200.00 | 200.00  |
| L-Cystine                       | 3.00   | 3.00    |
| Cornstarch                      | 397.44 | 167.44  |
| $\alpha$ -Cornstarch            | 132.00 | 132.00  |
| Sucrose                         | 100.00 | 100.00  |
| Corn oil                        | 70.00  | 20.00   |
| Lard                            | 0.00   | 1400.00 |
| Beef tallow                     | 0.00   | 1400.00 |
| Cellulose                       | 50.00  | 50.00   |
| Mineral Mix (AIN-93G)           | 35.00  | 35.00   |
| Vitamin Mix (AIN-93)            | 10.00  | 10.00   |
| Choline chloride                | 2.50   | 2.50    |
| Tert-butylhydroquinone          | 0.06   | 0.06    |
| Energy density (kcal/g diet)    | 3.69   | 4.82    |
| Macronutrients (% total energy) |        |         |
| Protein                         | 19%    | 15%     |
| Carbohydrate                    | 62%    | 33%     |
| Fat                             | 19%    | 52%     |

**Supplementary Table S3. Primers for amplification of genes by qRT-PCR**

| Gene                        | Sequences of primers                                          | Anneal Temp (°C) | Steps |
|-----------------------------|---------------------------------------------------------------|------------------|-------|
| mouse <i>Acc</i>            | 5'-GGAGATGTACGCTGACCGAGAA-3'<br>5'-ACCCGACGCATGGTTTTCA-3'     | 60               | 2     |
| mouse <i>Atgl</i>           | 5'-TGTGGCCTCATTCTCCTAC-3'<br>5'-TCGTGGATGTTGGTGGAGCT-3'       | 58               | 2     |
| mouse <i>Cd36</i>           | 5'-GCCAAGCTATTGCGACATGA-3'<br>5'-CAATGGTTGTCTGGATTCTGG-3'     | 58               | 2     |
| mouse <i>Cpt1a</i>          | 5'-GATCTACAATCCCCTCTGCTCT-3'<br>5'-TAGAGCCAGACCTTGAAGTAACG-3' | 60               | 2     |
| mouse <i>Fasn</i>           | 5'-TGGGTTCTAGCCAGCAGAGT-3'<br>5'-ACCACCAGAGACCGTTATGC-3'      | 60               | 2     |
| mouse <i>Hsl</i>            | 5'-GCTGGGCTGTCAAGCACTGT-3'<br>5'-GTAAGTGGGTAGGCTTGCCAT-3'     | 58               | 2     |
| mouse <i>Lpl</i>            | 5'-GTGGCCGAGAGCGAGAACAT-3'<br>5'-GCTTTCACCTCGGATCCTCTC-3'     | 60               | 2     |
| mouse <i>Mtp</i>            | 5'-CATCTCCACAGTGCAGTTCTCACA-3'<br>5'-GGAGTTCACATCCGGCCACTA-3' | 58               | 2     |
| mouse <i>Pparg</i>          | 5'-GGAAGCCCTTTGGTGACTTTATGG-3'<br>5'-GCAGCAGGTTTCTTGGATGTC-3' | 58               | 2     |
| mouse <i>Ppara</i>          | 5'-AATGCAATTCGCTTTGGAAG-3'<br>5'-GGCCTTGACCTTGTTTCATGT-3'     | 60               | 2     |
| mouse <i>Srebp1c</i>        | 5'-AGCTGTCGGGGTAGCGTCTG-3'<br>5'-GAGAGTTGGCACCTGGGCTG-3'      | 55               | 2     |
| mouse $\beta$ -Actin        | 5'-TTGCTGACAGGATGCAGAAG-3'<br>5'-GTACTTGCGCTCAGGAGGAG-3'      | 60               | 2     |
| <i>Bacteroidetes</i> phylum | 5'-GGAGYATGTGGTTTAATTCGAAGCA-3'<br>5'-AGCTGACGACAACCATGCAG-3' | 60               | 3     |
| <i>Firmicutes</i> phylum    | 5'-GGARCATGTGGTTTAATTCGATGAT-3'<br>5'-AGCTGACGACAACCATGCAC-3' | 60               | 3     |
| <i>Bifidobacterium</i> spp. | 5'-TCGCGTCYGGTGTGAAAG-3'<br>5'-CCACATCCAGCRTCCAC-3'           | 60               | 3     |
| <i>Lactobacillus</i> spp.   | 5'-AGCAGTAGGGAATCTTCCA-3'<br>5'-CACCGCTACACATGGAG-3'          | 60               | 3     |
| All bacteria                | 5'-GTGSTGCAYGGYTGTCGTCA-3'<br>5'-ACGTCRTCCMCACCTTCCTC-3'      | 60               | 3     |
